# Supplementary material
Source: PubMed Central journal article supplement (PMC3482286)
Supplement: NIHMS373073-supplement-1.pdf [file NIHMS373073-supplement-1.pdf]

### Pressure Overload-induced Cardiac Remodeling and Dysfunction in the Absence of Interleukin 6 in Mice

N. Chin Lai, Mei Hua Gao, Eric Tang, Ruoying Tang, Tracy Guo,  
Nancy D. Dalton, Aihua Deng, Tong Tang

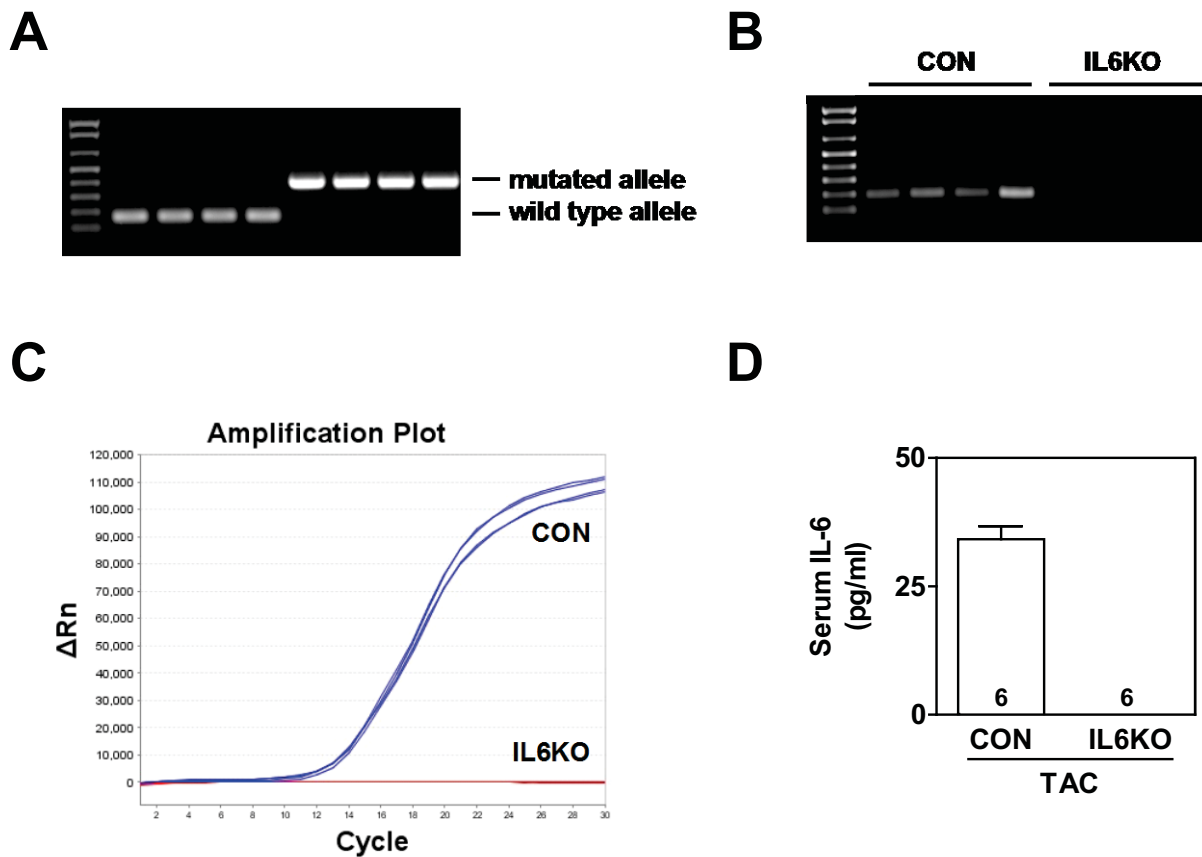

**Figure S1.** Confirmation of IL6 deficiency in IL6KO mice. (A) PCR analysis of tail genomic DNA shows mutated allele in IL6KO mice. (B) Agarose gel electrophoresis of RT-PCR reaction mix shows no IL-6 mRNA expression in LV samples from IL6KO mice. (C) Amplification plot from quantitative real-time RT-PCR shows no IL-6 mRNA expression in LV samples from IL6KO mice. (D) Pressure overload increased serum IL-6 levels in C57BL/6J mice to 34 pg/ml [serum IL-6 levels in normal C57BL/6J mice are below detection limit of the IL-6 ELISA kit (eBioscience, Inc., San Diego, CA)]. There is no detectable serum IL-6 in IL6KO mice 2 weeks after TAC. Error bars denote 1 SEM; numbers in bars indicate group size.

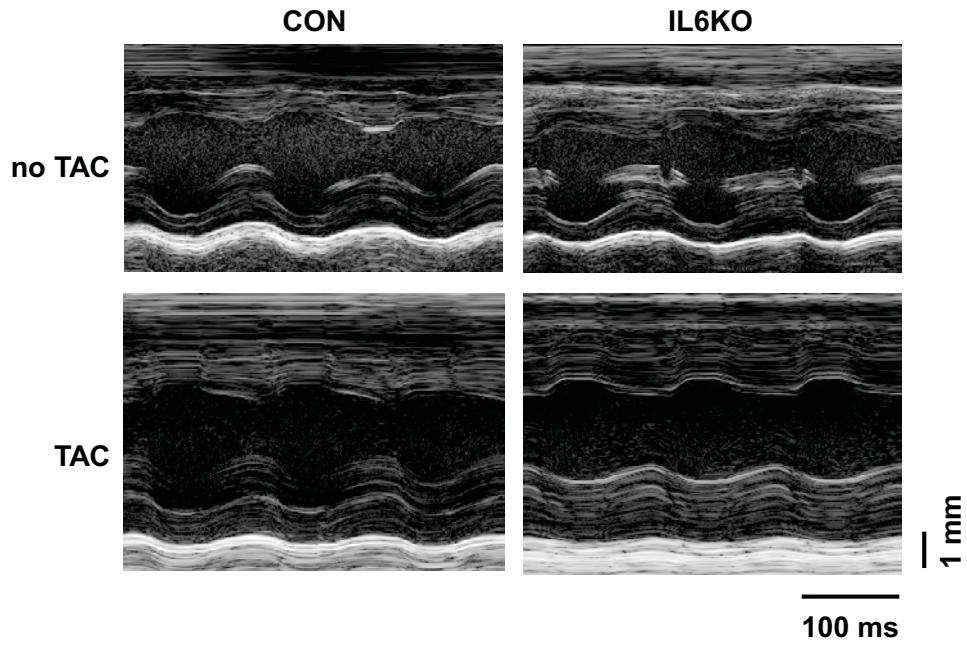

**Figure S2.** Representative echocardiograms of CON and IL6KO mice before and 2 weeks after pressure overload.

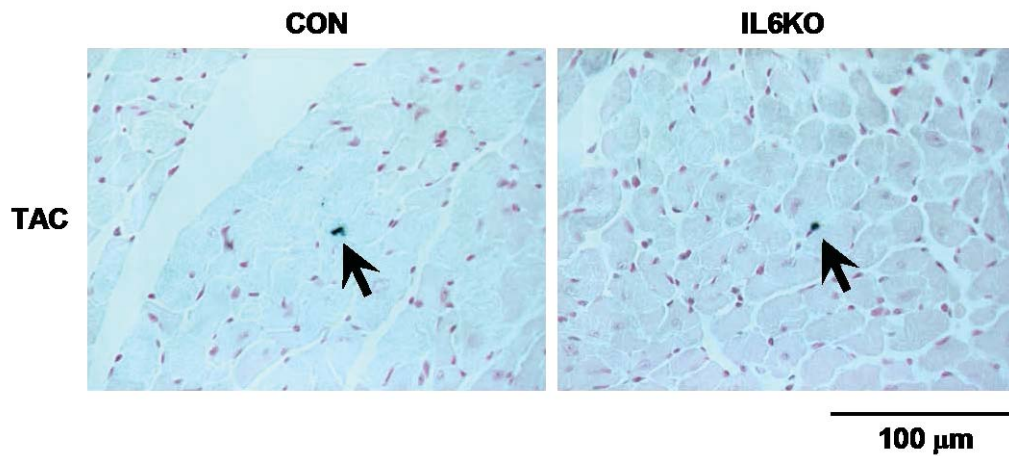

**Figure S3.** Representative photomicrographs showing TUNEL<sup>+</sup> cells in LV samples from CON and IL6KO mice 2 weeks after pressure overload.

**A**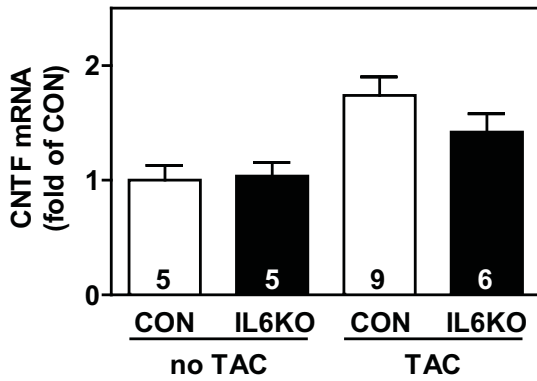**B**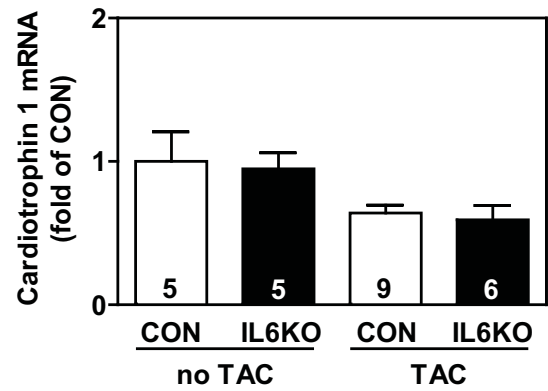

**Figure S4.** There was no group difference in mRNA content of ciliary neurotrophic factor (CNTF;  $P=0.20$ ) (A), and cardiotoxin 1 ( $P=0.65$ ) (B) in LV samples from CON and IL6KO mice 2 weeks after TAC. Probability values are from Bonferroni *post hoc* test (CON *vs* IL6KO, 2 weeks after TAC) after 2-way ANOVA. Error bars denote 1 SEM; numbers in bars indicate group size.
